---

## Correction to: LeishMANIAdb: a comparative resource for *Leishmania* proteins

This is a correction to: Gábor E Tusnády, András Zeke, Zsófia E Kálmán, Marie Fatoux, Sylvie Ricard-Blum, Toby J Gibson, Laszlo Dobson, LeishMANIAdb: a comparative resource for *Leishmania* proteins, *Database*, Volume 2023, <https://doi.org/10.1093/database/baad074>

In the originally published version of this manuscript there was a typographical error in the email for the corresponding author. This should read: [dobson.laszlo@ttk.hu](mailto:dobson.laszlo@ttk.hu). This error has been emended in the article.
